# Supplementary material for: The indirect impact of heart rate variability on cold pressor pain tolerance and intensity through psychological distress in individuals with chronic pain: the Tromsø Study
Source: PubMed Central journal article supplement — Pain Rep. 2021 Feb 15;7(2):e970. doi: 10.1097/PR9.0000000000000970 (PMC8849278; doi:10.1097/pr9.0000000000000970), 2021-02-15
Supplement: painreports-7-e970-s001.pdf [file painreports-7-e970-s001.pdf]

**Table I. P-values for Table 3:** Intercorrelations (Pearson r) among cardiovascular parameters, psychological distress, and cold pressor pain outcomes for overall chronic pain sample ( $n= 649$  to  $877$ ; Panel A), chronic pain males ( $n= 250$  to  $341$ ; Panel B) and chronic pain females ( $n = 403$  to  $536$ ; Panel C) in Tromsø 6. Partial correlation p-values controlling for age and BMI (and sex in Panel A) are shown in bold below the diagonal.

A.

| Total<br>( $n= 649 - 877$ ) | <b>rMSSD</b> | <b>SDNN</b>  | <b>BRS</b>   | <b>HSCL-10</b>   | <b>CPT</b> | <b>CPI</b> |
|-----------------------------|--------------|--------------|--------------|------------------|------------|------------|
| <b>rMSSD</b>                |              | <0.001       | <0.001       | 0.026            | 0.412      | 0.557      |
| <b>SDNN</b>                 | --           |              | <0.001       | 0.073            | 0.388      | 0.303      |
| <b>BRS</b>                  | --           | --           |              | 0.107            | 0.278      | 0.102      |
| <b>HSCL-10</b>              | <b>0.063</b> | <b>0.102</b> | <b>0.208</b> |                  | <0.001     | <0.001     |
| <b>CPT (sec)</b>            | <b>0.875</b> | <b>0.901</b> | <b>0.363</b> | <b>&lt;0.001</b> |            | <0.001     |
| <b>CPI</b>                  | <b>0.846</b> | <b>0.971</b> | <b>0.199</b> | <b>&lt;0.001</b> | --         |            |

*CPT, cold pressor tolerance; CPI, cold pressor intensity; BRS, baroreflex sensitivity; rMSSD, root mean square of the successive differences of the R-R intervals; SDNN, standard deviation of R-R intervals; HSCL-10, Hopkins symptom checklist-10*

**B.**

| Males<br>(n= 250 - 341) | <b>rMSSD</b> | <b>SDNN</b>  | <b>BRS</b>   | <b>HSCL-10</b> | <b>CPT</b> | <b>CPI</b> |
|-------------------------|--------------|--------------|--------------|----------------|------------|------------|
| <b>rMSSD</b>            |              | <0.001       | <0.001       | 0.015          | 0.138      | 0.313      |
| <b>SDNN</b>             | --           |              | <0.001       | 0.020          | 0.072      | 0.563      |
| <b>BRS</b>              | --           | --           |              | 0.176          | 0.153      | 0.147      |
| <b>HSCL-10</b>          | <b>0.041</b> | <b>0.026</b> | <b>0.211</b> |                | 0.006      | 0.068      |
| <b>CPT (s)</b>          | <b>0.239</b> | <b>0.286</b> | <b>0.116</b> | <b>0.018</b>   |            | <0.001     |
| <b>CPI</b>              | <b>0.244</b> | <b>0.550</b> | <b>0.144</b> | <b>0.162</b>   | --         |            |

*BRS, baroreflex sensitivity; rMSSD, root mean square of the successive differences of the R-R intervals; SDNN, standard deviation of R-R intervals; CPT, cold pressor tolerance; CPI, cold pressor intensity; HSCL-10, Hopkins symptom checklist-10*

C.

| Females<br>(n= 403 - 536) | <b>rMSSD</b> | <b>SDNN</b>  | <b>BRS</b>   | <b>HSCL-10</b> | <b>CPT</b> | <b>CPI</b> |
|---------------------------|--------------|--------------|--------------|----------------|------------|------------|
| <b>rMSSD</b>              |              | <0.001       | <0.001       | 0.290          | 0.997      | 0.958      |
| <b>SDNN</b>               | --           |              | <0.001       | 0.681          | 0.964      | 0.464      |
| <b>BRS</b>                | --           | --           |              | 0.459          | 0.831      | 0.414      |
| <b>HSCL-10</b>            | <b>0.294</b> | <b>0.556</b> | <b>0.409</b> |                | <0.001     | <0.001     |
| <b>CPT (s)</b>            | <b>0.549</b> | <b>0.604</b> | <b>0.990</b> | <0.001         |            | <0.001     |
| <b>CPI</b>                | <b>0.467</b> | <b>0.707</b> | <b>0.602</b> | <0.001         | --         |            |

*BRS, baroreflex sensitivity; rMSSD, root mean square of the successive differences of the R-R intervals; SDNN, standard deviation of R-R intervals; CPT, cold pressor tolerance; CPI, cold pressor intensity; HSCL-10, Hopkins symptom checklist-10*

**Table II. P-values for Table 4:** Correlations for (Pearson r) between clinical chronic pain measures (pain intensity and number of chronic pain sites) and cardiovascular parameters, psychological distress, and cold pressor measures in the Tromsø 6 chronic pain population.

|                         | Total (n = 651 - 877) |                              | Females (n = 401 - 536) |                              | Males (n = 250 - 341) |                              |
|-------------------------|-----------------------|------------------------------|-------------------------|------------------------------|-----------------------|------------------------------|
| Cardiovascular measures | Usual pain intensity  | Number of chronic pain sites | Usual pain intensity    | Number of chronic pain sites | Usual pain intensity  | Number of chronic pain sites |
| <b>rMSSD</b>            | 0.058                 | 0.102                        | 0.022                   | 0.029                        | 0.938                 | 0.837                        |
| <b>SDNN</b>             | 0.091                 | 0.003                        | 0.017                   | 0.005                        | 0.706                 | 0.416                        |
| <b>BRS</b>              | 0.049                 | 0.893                        | 0.011                   | 0.242                        | 0.901                 | 0.132                        |
| <b>HSCL-10</b>          | <0.001                | <0.001                       | <0.001                  | <0.001                       | 0.238                 | 0.001                        |
| <b>CPT</b>              | 0.001                 | 0.008                        | 0.015                   | 0.198                        | 0.059                 | 0.319                        |
| <b>CPI</b>              | 0.002                 | 0.121                        | 0.005                   | 0.004                        | 0.257                 | 0.507                        |

*Pearson correlation coefficients were given. Number of chronic pain sites = total number of pain locations*

*BRS, baroreflex sensitivity; rMSSD, root mean square of the successive differences of the R-R intervals; SDNN, standard deviation of R-R intervals; CPT, cold pressor tolerance; CPI, cold pressor intensity; HSCL-10, Hopkins symptom checklist-10*

**Table III. Mediation analyses without imputing missing data for Table 5:** The total direct effect and indirect effect (via psychological distress) of cardiovascular parameters on cold pressor pain tolerance and intensity in the overall Tromsø 6 chronic pain population (Panel A), in men only (Panel B), in women only (Panel C), and between men and women (Panel D).

**A. Overall chronic pain population ( $n = 561 - 760$ )**

| Cardiovascular parameter | Cold pressor outcome | Without Imputing Missing Data<br>( $n = 561-760$ ) Total |                                               |
|--------------------------|----------------------|----------------------------------------------------------|-----------------------------------------------|
|                          |                      | Direct Effect (95% CI)                                   | Indirect/mediated effect via HSCL-10 (95% CI) |
| <b>rMSSD</b>             | <b>CPT</b>           | 0.003<br>(-0.081, 0.080)                                 | 0.019<br>(0.004, 0.037)                       |
|                          | <b>CPI</b>           | 0.0001<br>(-0.007, 0.006)                                | -0.001<br>(-0.003, -0.0003)                   |
| <b>SDNN</b>              | <b>CPT</b>           | 0.007<br>(-0.076, 0.079)                                 | 0.014<br>(-0.002, 0.030)                      |
|                          | <b>CPI</b>           | -0.001<br>(-0.007, 0.005)                                | -0.001<br>(-0.002, 0.00004)                   |
| <b>BRS</b>               | <b>CPT</b>           | 0.061<br>(-0.077, 0.150)                                 | 0.029<br>(0.007, 0.061)                       |
|                          | <b>CPI</b>           | -0.007<br>(-0.017, 0.005)                                | -0.002<br>(-0.004, -0.0006)                   |

*BRS, baroreflex sensitivity; rMSSD, root mean square of the successive differences of the R-R intervals; SDNN, standard deviation of R-R intervals*

*\* $p < 0.05$*

**B. Male chronic pain participants only (n = 217 – 297)**

| Cardiovascular parameter | Cold pressor outcome | Without Imputing Missing Data<br>(n = 217 – 297) Male |                                               |
|--------------------------|----------------------|-------------------------------------------------------|-----------------------------------------------|
|                          |                      | Direct Effect (95% CI)                                | Indirect/mediated effect via HSCL-10 (95% CI) |
| <b>rMSSD</b>             | <b>CPT</b>           | 0.075<br>(-0.036, 0.176)                              | 0.024<br>(0.004, 0.051)                       |
|                          | <b>CPI</b>           | -0.005<br>(-0.016, 0.006)                             | -0.001<br>(-0.003, 0.0003)                    |
| <b>SDNN</b>              | <b>CPT</b>           | 0.058<br>(-0.057, 0.163)                              | 0.022<br>(0.003, 0.050)                       |
|                          | <b>CPI</b>           | -0.002<br>(-0.013, 0.008)                             | -0.001<br>(-0.003, 0.0002)                    |
| <b>BRS</b>               | <b>CPT</b>           | 0.123<br>(0.047, 0.392)                               | 0.019<br>(-0.0008, 0.067)                     |
|                          | <b>CPI</b>           | -0.009<br>(-0.026, 0.0002)                            | -0.0009<br>(-0.004, 0.001)                    |

*BRS, baroreflex sensitivity; rMSSD, root mean square of the successive differences of the R-R intervals; SDNN, standard deviation of R-R intervals*

*\*p<0.05*

C. Female chronic pain participants only (n = 344 – 463)

| Cardiovascular parameter | Cold pressor outcome | Without Imputing Missing Data<br>(n = 344 – 463) |                                               |
|--------------------------|----------------------|--------------------------------------------------|-----------------------------------------------|
|                          |                      | Direct Effect (95% CI)                           | Indirect/mediated effect via HSCL-10 (95% CI) |
| rMSSD                    | CPT                  | -0.041<br>(-0.164, 0.073)                        | 0.012<br>(-0.010, 0.036)                      |
|                          | CPI                  | 0.003<br>(-0.005, 0.010)                         | -0.0009<br>(-0.003, 0.0006)                   |
| SDNN                     | CPT                  | -0.028<br>(-0.143, 0.072)                        | 0.003<br>(-0.021, 0.024)                      |
|                          | CPI                  | 0.00008<br>(-0.007, 0.008)                       | -0.0003<br>(-0.002, 0.001)                    |
| BRS                      | CPT                  | -0.036<br>(-0.465, 0.145)                        | 0.021<br>(-0.045, 0.069)                      |
|                          | CPI                  | -0.003<br>(-0.024, 0.021)                        | -0.002<br>(-0.006, 0.003)                     |

*BRS, baroreflex sensitivity; rMSSD, root mean square of the successive differences of the R-R intervals; SDNN, standard deviation of R-R intervals*

\**p*<0.05

**D. Moderated mediation for chronic pain participants ( $n = 877$ )**

| Cardiovascular parameter | Cold pressor outcome | Without Imputing Missing Data<br>( $n = 561 - 760$ )     |                                                           |
|--------------------------|----------------------|----------------------------------------------------------|-----------------------------------------------------------|
|                          |                      | Difference in mediated effects between males and females | Percentile method: bootstrapped 95% CI for the difference |
| <b>rMSSD</b>             | <b>CPT</b>           | 0.01179                                                  | (-0.0211, 0.0465)                                         |
|                          | <b>CPI</b>           | -0.000366                                                | (-0.0027, 0.0020)                                         |
| <b>SDNN</b>              | <b>CPT</b>           | 0.0189                                                   | (-0.010, 0.0553)                                          |
|                          | <b>CPI</b>           | -0.00089                                                 | (-0.0035, 0.0013)                                         |
| <b>BRS</b>               | <b>CPT</b>           | -0.0022                                                  | (-0.0605, 0.0776)                                         |
|                          | <b>CPI</b>           | 0.00092                                                  | (-0.0046, 0.0051)                                         |
